# Supplementary material for: Application of Extrusion-Cooking for Processing of White and Red Bean to Create Specific Functional Properties
Source: MDPI journal article supplement (doi:10.3390/app13031671), 2023-01-28
Supplement: s1 [file s1]

**Table S1.** Two-way ANOVA for physical properties of extruded red Toska beans

| Variables | Source    | SS      | DF | MS     | F      | p       |
|-----------|-----------|---------|----|--------|--------|---------|
| SME       | rpm       | 0.2390  | 4  | 0.0597 | 550.98 | 0.0000  |
|           | water     | 0.2312  | 4  | 0.0578 | 533.07 | 0.0000  |
|           | rpm×water | 0.0096  | 16 | 0.0006 | 5.56   | 0.00001 |
| ER        | rpm       | 4.630   | 4  | 1.157  | 715.7  | 0.0000  |
|           | water     | 12.515  | 4  | 3.129  | 1934.5 | 0.0000  |
|           | rpm×water | 2.096   | 16 | 0.131  | 81.0   | 0.0000  |
| WAI       | rpm       | 0.682   | 4  | 0.171  | 2.20   | 0.0826  |
|           | water     | 1.547   | 4  | 0.387  | 4.98   | 0.0018  |
|           | rpm×water | 3.474   | 16 | 0.217  | 2.80   | 0.0028  |
| WSI       | rpm       | 1202.91 | 4  | 300.73 | 50.732 | 0.0000  |
|           | water     | 1373.20 | 4  | 343.30 | 57.914 | 0.0000  |
|           | rpm×water | 825.17  | 16 | 51.57  | 8.700  | 0.0000  |
| Viscosity | rpm       | 4884.7  | 4  | 1221.2 | 85.92  | 0.0000  |
|           | water     | 10536.2 | 4  | 2634.0 | 185.32 | 0.0000  |
|           | rpm×water | 3780.2  | 16 | 236.3  | 16.62  | 0.0000  |
| $L^*$     | rpm       | 225.3   | 4  | 56.3   | 23.3   | 0.0000  |
|           | water     | 57.4    | 4  | 14.4   | 5.9    | 0.0003  |
|           | rpm×water | 864.8   | 16 | 54.0   | 22.4   | 0.0000  |
| $a^*$     | rpm       | 16.510  | 4  | 4.128  | 6.672  | 0.0001  |
|           | water     | 5.342   | 4  | 1.336  | 2.159  | 0.0791  |
|           | rpm×water | 14.772  | 16 | 0.923  | 1.492  | 0.1174  |
| $b^*$     | rpm       | 64.14   | 4  | 16.04  | 2.007  | 0.0993  |
|           | water     | 32.53   | 4  | 8.13   | 1.018  | 0.4019  |
|           | rpm×water | 247.00  | 16 | 15.44  | 1.932  | 0.0257  |

**Table S2.** Two-way ANOVA for physical properties of extruded white Aura beans

| Variables | Source    | SS      | DF | MS     | F      | p      |
|-----------|-----------|---------|----|--------|--------|--------|
| SME       | rpm       | 0.2499  | 4  | 0.0624 | 669.0  | 0.0000 |
|           | water     | 0.1070  | 4  | 0.0267 | 286.7  | 0.0000 |
|           | rpm×water | 0.0098  | 16 | 0.0006 | 6.6    | 0.0000 |
| ER        | rpm       | 5.926   | 4  | 1.481  | 1216.9 | 0.0000 |
|           | water     | 17.661  | 4  | 4.415  | 3627.0 | 0.0000 |
|           | rpm×water | 0.514   | 16 | 0.032  | 26.4   | 0.0000 |
| WAI       | rpm       | 0.292   | 4  | 0.073  | 2.0    | 0.1040 |
|           | water     | 0.134   | 4  | 0.033  | 0.9    | 0.4521 |
|           | rpm×water | 2.623   | 16 | 0.164  | 4.6    | 0.0000 |
| WSI       | rpm       | 1062.19 | 4  | 265.55 | 123.59 | 0.0000 |
|           | water     | 807.72  | 4  | 201.93 | 93.98  | 0.0000 |
|           | rpm×water | 783.62  | 16 | 48.98  | 22.79  | 0.0000 |
| Viscosity | rpm       | 445.7   | 4  | 111.4  | 10.14  | 0.0000 |
|           | water     | 635.6   | 4  | 158.9  | 14.46  | 0.0000 |
|           | rpm×water | 1901.3  | 16 | 118.8  | 10.82  | 0.0000 |
| $L^*$     | rpm       | 223.5   | 4  | 55.9   | 25.1   | 0.0000 |
|           | water     | 62.4    | 4  | 15.6   | 7.0    | 0.0001 |
|           | rpm×water | 313.4   | 16 | 19.6   | 8.8    | 0.0000 |
| $a^*$     | rpm       | 11.3317 | 4  | 2.8329 | 5.895  | 0.0003 |
|           | water     | 13.6197 | 4  | 3.4049 | 7.085  | 0.0001 |
|           | rpm×water | 19.4523 | 16 | 1.2158 | 2.530  | 0.0027 |
| $b^*$     | rpm       | 49.15   | 4  | 12.29  | 14.39  | 0.0000 |
|           | water     | 24.29   | 4  | 6.07   | 7.11   | 0.0000 |
|           | rpm×water | 83.38   | 16 | 5.21   | 6.11   | 0.0000 |

**Table S3.** Two-way ANOVA for nutritional properties of extruded red Toska beans

| Variables            | Source    | SS      | DF | MS     | F        | p      |
|----------------------|-----------|---------|----|--------|----------|--------|
| Protein              | rpm       | 6.12    | 4  | 1.53   | 14.1     | 0.0000 |
|                      | water     | 4.59    | 4  | 1.15   | 10.6     | 0.0000 |
|                      | rpm×water | 32.03   | 16 | 2.00   | 18.5     | 0.0000 |
| Fiber                | rpm       | 2.113   | 4  | 0.528  | 395536.9 | 0.0000 |
|                      | water     | 1.810   | 4  | 0.453  | 338862.  | 0.0000 |
|                      | rpm×water | 7.798   | 16 | 0.487  | 364987.1 | 0.0000 |
| Reducing sugar       | rpm       | 76.764  | 4  | 19.191 | 32.615   | 0.0000 |
|                      | water     | 19.545  | 4  | 4.886  | 8.304    | 0.0002 |
|                      | rpm×water | 225.132 | 16 | 14.071 | 23.913   | 0.0000 |
| Total Phenols        | rpm       | 17.806  | 4  | 4.452  | 9.940    | 0.0001 |
|                      | water     | 122.370 | 4  | 30.593 | 68.310   | 0.0000 |
|                      | rpm×water | 334.316 | 16 | 20.895 | 46.656   | 0.0000 |
| Anthocyanin          | rpm       | 0.31026 | 4  | 0.0776 | 6265     | 0.0000 |
|                      | water     | 0.41919 | 4  | 0.1048 | 8465     | 0.0000 |
|                      | rpm×water | 1.19626 | 16 | 0.0748 | 6039     | 0.0000 |
| Total Flavonoids     | rpm       | 0.0103  | 4  | 0.0026 | 289.82   | 0.0000 |
|                      | water     | 0.0091  | 4  | 0.0023 | 257.21   | 0.0000 |
|                      | rpm×water | 0.0169  | 16 | 0.0011 | 118.91   | 0.0000 |
| Antiradical activity | rpm       | 1.1021  | 4  | 0.2755 | 81.6     | 0.0000 |
|                      | water     | 3.3946  | 4  | 0.8487 | 251.4    | 0.0000 |
|                      | rpm×water | 5.2953  | 16 | 0.3310 | 98.0     | 0.0000 |
| Reducing power       | rpm       | 2.9359  | 4  | 0.7340 | 52.623   | 0.0000 |
|                      | water     | 1.9968  | 4  | 0.4992 | 35.791   | 0.0000 |
|                      | rpm×water | 15.7285 | 16 | 0.9830 | 70.480   | 0.0000 |

**Table S4.** Two-way ANOVA for nutritional properties of extruded white Aura beans

| Variables            | Source    | SS      | DF | MS     | F      | p      |
|----------------------|-----------|---------|----|--------|--------|--------|
| Protein              | rpm       | 2.29    | 4  | 0.57   | 4.6    | 0.0067 |
|                      | water     | 12.53   | 4  | 3.13   | 24.9   | 0.0000 |
|                      | rpm×water | 24.78   | 16 | 1.55   | 12.3   | 0.0000 |
| Fiber                | rpm       | 1.562   | 4  | 0.390  | 54704  | 0.0000 |
|                      | water     | 8.743   | 4  | 2.186  | 306253 | 0.0000 |
|                      | rpm×water | 30.814  | 16 | 1.926  | 269842 | 0.0000 |
| Reducing sugar       | rpm       | 159.875 | 4  | 39.969 | 99.045 | 0.0000 |
|                      | water     | 68.275  | 4  | 17.069 | 42.297 | 0.0000 |
|                      | rpm×water | 203.611 | 16 | 12.726 | 31.535 | 0.0000 |
| Total Phenols        | rpm       | 5.9954  | 4  | 1.4989 | 9.309  | 0.0001 |
|                      | water     | 2.4176  | 4  | 0.6044 | 3.754  | 0.0159 |
|                      | rpm×water | 15.7158 | 16 | 0.9822 | 6.101  | 0.0000 |
| Total Flavonoids     | rpm       | 0.0021  | 4  | 0.0005 | 2.387  | 0.0781 |
|                      | water     | 0.0076  | 4  | 0.0019 | 8.825  | 0.0001 |
|                      | rpm×water | 0.1284  | 16 | 0.0080 | 37.341 | 0.0000 |
| Antiradical activity | rpm       | 0.0498  | 4  | 0.0124 | 6.1177 | 0.0014 |
|                      | water     | 0.0068  | 4  | 0.0017 | 0.8298 | 0.5189 |
|                      | rpm×water | 0.1908  | 16 | 0.0119 | 5.8626 | 0.0001 |
| Reducing power       | rpm       | 0.0265  | 4  | 0.0066 | 184.56 | 0.0000 |
|                      | water     | 0.0718  | 4  | 0.0179 | 499.84 | 0.0000 |
|                      | rpm×water | 0.1383  | 16 | 0.0086 | 240.66 | 0.0000 |
